# Supplementary material for: Cross species selection scans identify components of C4 photosynthesis in the grasses
Source: PubMed Central journal article supplement (PMC5429014; doi:10.1093/jxb/erw256), 2016-07-19
Supplement: erw256_suppl_Supplementary_Table_S1_S4_S5.pdf [file erw256_suppl_Supplementary_Table_S1_S4_S5.pdf]

**Table S1. Phylogenies used for positive selection test given maize duplication, gene loss in rice or Brachypodium, under different phylogenetic conditions.**

| Duplication/Loss  | Full <sup>a</sup><br>①                      | Exclude Zm <sup>b</sup><br>②     | Exclude Sb<br>③                         | Exclude Si<br>④                     |
|-------------------|---------------------------------------------|----------------------------------|-----------------------------------------|-------------------------------------|
| Full <sup>c</sup> | ((Zm, Sb) #1, (Si #1, Do), (Os, Bd))        | ((Sb #1, (Si #1, Do)), (Os, Bd)) | ((Zm #1, (Si #1, Do)), (Os, Bd))        | ((Zm, Sb) #1, Do), (Os, Bd))        |
| Duplication in Zm | ((Zm1, Zm2), Sb) #1, (Si #1, Do), (Os, Bd)) | ((Sb #1, (Si #1, Do)), (Os, Bd)) | ((Zm1, Zm2) #1, (Si #1, Do)), (Os, Bd)) | ((Zm1, Zm2), Sb) #1, Do), (Os, Bd)) |
| Loss in Os        | ((Zm, Sb) #1, (Si #1, Do), Bd)              | ((Sb #1, (Si #1, Do)), Bd)       | ((Zm #1, (Si #1, Do)), Bd)              | ((Zm, Sb) #1, Do), Bd)              |
| Loss in Bd        | ((Zm, Sb) #1, (Si #1, Do), Os)              | ((Sb #1, (Si #1, Do)), Os)       | ((Zm #1, (Si #1, Do)), Os)              | ((Zm, Sb) #1, Do), Os)              |

  

| Duplication/Loss  | Exclude Zm-Sb<br>⑤          | Exclude Si-Sb<br>⑥             | Exclude Si-Zm<br>⑦      |
|-------------------|-----------------------------|--------------------------------|-------------------------|
| Full <sup>c</sup> | ((Si #1, Do), (Os, Bd))     | ((Zm #1, Do), (Os, Bd))        | ((Sb #1, Do), (Os, Bd)) |
| Duplication in Zm | ((Si #1, Do), (Os, Bd))     | ((Zm1, Zm2) #1, Do), (Os, Bd)) | ((Sb #1, Do), (Os, Bd)) |
| Loss in Os        | Not considered <sup>d</sup> | Not considered                 | Not considered          |
| Loss in Bd        | Not considered              | Not considered                 | Not considered          |

  

| Duplication/Loss  | Exclude Do<br>⑧                       | Exclude Do-Si clade<br>⑨       |
|-------------------|---------------------------------------|--------------------------------|
| Full <sup>c</sup> | ((Zm, Sb) #1, Si #1), (Os, Bd))       | ((Zm, Sb) #1, (Os, Bd))        |
| Duplication in Zm | ((Zm1, Zm2), Sb) #1, Si #1, (Os, Bd)) | ((Zm1, Zm2), Sb) #1, (Os, Bd)) |
| Loss in Os        | ((Zm, Sb) #1, Si #1), Bd)             | Not considered                 |
| Loss in Bd        | ((Zm, Sb) #1, Si #1), Os)             | Not considered                 |

<sup>a</sup> Zm: maize; Sb: sorghum; Si: *Setaria italia*; Do: *Dichanthelium*; Bd: *Brachypodium distachyon*; Os: rice

<sup>b</sup> The “#1” sign designate C<sub>4</sub> leading branches on the testing phylogeny

<sup>c</sup> The full phylogenies are shown in Fig. 1

<sup>d</sup> Situation not considered due to only 3 taxa left

**Table S4. Gene names and syntenic ortholog group correspondence for six grass species**

| Gene name                 | Ortholog group name<br>( <i>Setaria</i> ) | maize                                         | sorghum          | rice            | <i>Brachypodium</i> | <i>Dichanthelium</i> <sup>a</sup> |
|---------------------------|-------------------------------------------|-----------------------------------------------|------------------|-----------------|---------------------|-----------------------------------|
| <b>NADP-ME</b>            | Si000645m                                 | GRMZM2G085019                                 | Sobic.003G036200 | LOC_Os01g09320  | Bradi2g05620        | Do024386.1                        |
| <b>PPDK</b>               | Si021174m                                 | GRMZM2G306345,<br>GRMZM2G097457               | Sobic.009G132900 | LOC_Os05g33570  | Bradi2g25745        | Do015534.1                        |
| <b>PEPC</b>               | Si005789m                                 | GRMZM2G083841                                 | Sobic.010G160700 | NA <sup>b</sup> | Bradi1g39167        | Do021545.1                        |
| <b>CA</b> <sup>c</sup>    | Si003882m                                 | GRMZM2G121878<br>(fused protein) <sup>d</sup> | Sobic.003G234200 | LOC_Os01g45274  | Bradi2g44856        | Do001290.1                        |
| <b>NADP-MDH</b>           | Si013632m                                 | GRMZM2G129513                                 | Sobic.007G166200 | LOC_Os08g44810  | Bradi3g12460        | Do003942.1                        |
| <b>PCK</b>                | Si034404m                                 | GRMZM5G870932,<br>GRMZM2G001696               | Sobic.001G432800 | LOC_Os03g15050  | Bradi1g67730        | Do007037.1                        |
| <b>AspAT1</b>             | Si017156m                                 | GRMZM5G836910                                 | Sobic.004G331700 | LOC_Os02g55420  | Bradi3g54200        | Do004307.1                        |
| <b>AspAT2</b>             | Si001361m                                 | GRMZM2G094712                                 | Sobic.003G303300 | LOC_Os01g55540  | Bradi2g50500        | Do016694.1                        |
| <b>OMT</b>                | Si024403m                                 | GRMZM2G383088                                 | Sobic.008G112300 | LOC_Os12g33080  | Bradi4g06300        | Do017525.1                        |
| <b>DCT1</b>               | Si029415m                                 | GRMZM2G040933,<br>GRMZM2G515874               | Sobic.002G233700 | LOC_Os09g29430  | Bradi4g32730        | Do013844.1                        |
| <b>DCT4</b> <sup>c</sup>  | Si035016m                                 | N.A.                                          | Sobic.004G035500 | N.A.            | N.A.                | N.A.                              |
| <b>DCT2</b>               | Si013503m                                 | GRMZM2G086258                                 | Sobic.007G226800 | LOC_Os08g37600  | Bradi3g38580        | Do011021.1                        |
| <b>MEP3_a</b>             | Si024315m                                 | GRMZM2G305851                                 | Sobic.009G124000 | LOC_Os05g32230  | Bradi2g26950        | Do020718.1                        |
| <b>MEP3_b</b>             | Si000451m                                 | GRMZM2G099036                                 | Sobic.003G341300 | LOC_Os01g61120  | Bradi2g53780        | Do007926.1                        |
| <b>MEP3_c</b>             | Si005376m                                 | GRMZM2G138258                                 | Sobic.003G431900 | LOC_Os01g72710  | Bradi2g61270        | N.A.                              |
| <b>NHD</b>                | Si029362m                                 | GRMZM2G053927                                 | Sobic.002G141900 | LOC_Os09g02214  | Bradi4g08260        | Do023727.1                        |
| <b>BASS2</b> <sup>c</sup> | Si001591m                                 | N.A.                                          | Sobic.003G236800 | LOC_Os01g45750  | Bradi2g45100        | Do010383.1                        |
| <b>PPT1</b>               | Si013874m                                 | GRMZM2G174107                                 | N.A.             | N.A.            | N.A.                | Do023872.1                        |
| <b>PPT2</b>               | Si005351m                                 | GRMZM2G066413                                 | Sobic.003G050800 | LOC_Os01g07730  | Bradi2g04447        | Do025241.1                        |
| <b>TPT</b>                | Si001693m                                 | GRMZM2G070605                                 | Sobic.003G002300 | LOC_Os01g13770  | Bradi2g08340        | Do017690.1                        |
| <b>FBA3</b>               | Si010312m                                 | GRMZM2G046284                                 | Sobic.008G053200 | LOC_Os12g07210  | NA                  | Do000279.1                        |
| <b>FBA2</b>               | Si026480m                                 | GRMZM2G155253                                 | Sobic.005G056400 | LOC_Os11g07020  | Bradi4g24367        | Do010362.1                        |
| <b>FBP</b>                | Si002088m                                 | GRMZM5G836250                                 | Sobic.003G367500 | LOC_Os01g64660  | Bradi2g56030        | Do003645.1                        |
| <b>FBA1</b>               | Si006745m                                 | GRMZM2G345493                                 | Sobic.010G188300 | LOC_Os06g40640  | Bradi1g36260        | Do000618.1                        |
| <b>CAT2</b>               | Si035374m                                 | GRMZM2G090568                                 | Sobic.001G517700 | LOC_Os03g03910  | Bradi1g76330        | Do015295.1                        |
| <b>HPR</b>                | Si017480m                                 | GRMZM2G074282                                 | Sobic.004G001300 | LOC_Os02g01150  | Bradi3g00330        | Do025649.1                        |
| <b>VAN1</b>               | Si028928m                                 | GRMZM2G059225                                 | Sobic.002G260700 | LOC_Os09g33600  | Bradi4g34880        | Do005223.1                        |
| <b>SCL</b>                | Si026111m                                 | GRMZM5G895672                                 | Sobic.005G231000 | N.A.            | Bradi4g09160        | Do021853.1                        |
| <b>DRP5B</b>              | Si009435m                                 | GRMZM2G005848                                 | Sobic.008G058000 | LOC_Os12g07880  | Bradi4g41137        | Do011342.1                        |
| <b>STP1</b>               | Si035219m                                 | GRMZM2G374812                                 | Sobic.001G543500 | LOC_Os03g01170  | Bradi1g78400        | Do022428.1                        |
| <b>HB22</b>               | Si032496m                                 | GRMZM2G389379                                 | Sobic.002G231100 | LOC_Os09g29130  | Bradi4g32580        | Do019488.1                        |
| <b>GLR</b>                | Si005804m                                 | GRMZM2G148807                                 | Sobic.010G231300 | LOC_Os06g46670  | Bradi1g32800        | Do001711.1                        |

<sup>a</sup> All *Dichanthelium* orthologs are determined by BLASTN and gene phylogeny instead of gene synteny

<sup>b</sup> N.A. indicates no clear syntenic orthologs found in the corresponding species

<sup>c</sup> For these genes the homologs are manually determined using BLASTN, and orthology is verified by phylogeny and gene synteny when available.

<sup>d</sup> GRMZM2G121878 is known to be a fused protein of two tandem copies (Studer *et al.* 2014).

**Table S5. Gene ontology enrichment analysis using *Arabidopsis thaliana* homologs**

| <b>GO term</b> | <b>Ontology</b> | <b>Description</b>                                    | <b>Number<br/>in input<br/>list</b> | <b>Number<br/>in<br/>BG/Ref</b> | <b>p-value</b> | <b>FDR</b> |
|----------------|-----------------|-------------------------------------------------------|-------------------------------------|---------------------------------|----------------|------------|
| GO:0015672     | P               | monovalent inorganic cation transport                 | 5                                   | 32                              | 0.00017        | 0.042      |
| GO:0015291     | F               | secondary active transmembrane transporter activity   | 8                                   | 65                              | 1.40E-05       | 0.00097    |
| GO:0022891     | F               | substrate-specific transmembrane transporter activity | 12                                  | 192                             | 0.00012        | 0.0045     |
| GO:0015297     | F               | antiporter activity                                   | 5                                   | 33                              | 0.0002         | 0.0048     |
| GO:0022892     | F               | substrate-specific transporter activity               | 12                                  | 222                             | 0.00046        | 0.0066     |
| GO:0022857     | F               | transmembrane transporter activity                    | 13                                  | 248                             | 0.00037        | 0.0066     |
| GO:0015075     | F               | ion transmembrane transporter activity                | 9                                   | 139                             | 0.0006         | 0.0072     |
| GO:0005215     | F               | transporter activity                                  | 14                                  | 317                             | 0.0012         | 0.011      |
| GO:0022804     | F               | active transmembrane transporter activity             | 9                                   | 152                             | 0.0011         | 0.011      |
